# Supplementary material for: Ferrocenyl substituted calixarenes: synthesis, structure and properties
Source: Royal Society of Chemistry journal article supplement (doi:10.1039/c3ra00146f), 2013-01-01
Supplement: c3ra00146f.pdf [file c3ra00146f.pdf]

## **Supporting Information**

### **Ferrocenyl substituted calixarenes: synthesis, structure, and properties**

**Rekha Sharma<sup>a</sup>, Ramesh Margani<sup>a</sup>, Shaikh M. Mobin<sup>a</sup> and Rajneesh Misra<sup>\*a</sup>**

Department of Chemistry,  
Indian Institute of Technology Indore,  
Indore- 452 017, India.

[rajneeshmisra@iiti.ac.in](mailto:rajneeshmisra@iiti.ac.in)

#### **Table of Contents**

|                                                                                                        |            |
|--------------------------------------------------------------------------------------------------------|------------|
| <b>I. Experimental details</b> .....                                                                   | <b>S2</b>  |
| <b>II. Crystallographic data</b> .....                                                                 | <b>S4</b>  |
| <b>III. Electrochemical Data for 5b-5c</b> .....                                                       | <b>S7</b>  |
| <b>IV. Copies of <sup>1</sup>H NMR, <sup>13</sup>C NMR and HRMS Spectra of the New Compounds</b> ..... | <b>S8</b>  |
| <b>V. TGA plots for compounds 5a-5c</b> .....                                                          | <b>S17</b> |
| <b>VI. References</b> .....                                                                            | <b>S17</b> |

**General:** Chemicals were used as received unless otherwise indicated. All oxygen or moisture sensitive reactions were performed under nitrogen/argon atmosphere using standard schlenk method. Triethylamine (TEA) was received from commercial source, and distilled on KOH prior to use.  $^1\text{H}$  NMR (400 MHz), and  $^{13}\text{C}$  NMR (100MHz) spectra were recorded on the Bruker Avance (III) 400 MHz, using  $\text{CDCl}_3$  as solvent. Tetramethylsilane (TMS) was used as reference for recording  $^1\text{H}$  (of residual proton;  $\delta = 7.26$  ppm), and  $^{13}\text{C}$  ( $\delta = 77.0$  ppm) spectra in  $\text{CDCl}_3$ . UV-visible absorption spectra of all compounds in Dichloromethane were recorded on a Carry-100 Bio UV-visible Spectrophotometer. Cyclic voltamograms (CVs) were recorded on a CHI620D electrochemical analyzer using Platinum as a working electrode, Pt wire as the counter electrode, and  $\text{Ag}/\text{Ag}^+$  as the reference electrode. HRMS was recorded on Bruker-Daltonics, micrO TOF-Q II mass spectrometer.

### Synthesis and Characterization

The reactant **5a** was purchased from Sigma-Aldrich, and the reactants **5b-5c** were synthesized via diazotization of 4-ethynylaniline, and 3-ethynylaniline respectively, according to known methods.<sup>1</sup>

#### General procedure for synthesis of **5a-5c**.

5,11,17,23-Tetraiodo-25,26,27,28-tetra-(*n*-propoxy)calix[4]arene **4** (160 mg, 0.14 mmol) was stirred together with  $\text{Pd}(\text{PPh}_3)_2\text{Cl}_2$  (40 mg, 0.05 mmol) and  $\text{CuI}$  (0.09 mg, 0.05 mmol) in degassed diisopropylamine (20 mL) and THF (20ml) for 30 min at room temperature before the corresponding ethynyl ferrocene (6 equivalent, 0.875mmol) was added. The mixture was heated at 80 °C for 48 h. The solvent was removed; the remaining residue was suspended in water (50 mL) and extracted with EtOAc (3 x 20 mL). The combined organic layers were dried ( $\text{MgSO}_4$ ) and concentrated in vacuum. The resulting crude product was purified by column chromatography on silica gel eluting with  $\text{CH}_2\text{Cl}_2$ /hexane (2:3). The desired compound obtained

from the column was recrystallized from chloroform/methanol to give compounds **5a-5c** in 70-80% yield.

Compound **5a**: Orange solid (164 mg, 79%)  $^1\text{H}$  NMR (400 MHz,  $\text{CDCl}_3$ ):  $\delta$  (ppm) 6.93 (s, 8H), 4.40-4.43 (m, 12H), 4.19 (s, 20H), 4.11 (s, 8H), 3.88 (t, 8H), 3.16 (d, 4H,  $J = 12.23$  Hz), 1.94 (m, 8H), 0.99 (t, 12H);  $^{13}\text{C}$  NMR (100 MHz,  $\text{CDCl}_3$ ):  $\delta = 156.57, 134.74, 131.19, 117.18, 86.88, 86.25, 71.59, 70.02, 68.58, 66.23, 31.03, 23.36, 10.49$ . HRMS (ESI)  $m/z$ , calcd for  $\text{MH}^+$  ( $\text{C}_{88}\text{H}_{80}\text{Fe}_4\text{O}_4$ ): 1424.3462; found: 1424.3516.

Compound **5b**: Orange solid (176 mg, 70%)  $^1\text{H}$  NMR (400 MHz,  $\text{CDCl}_3$ ):  $\delta$  (ppm) 7.36 (d, 8H,  $J = 8.55$  Hz), 7.27 (d, 8H,  $J = 8.29$  Hz), 6.99 (s, 8H), 4.57 (m, 8H), 4.45 (d, 4H,  $J = 13.31$  Hz), 4.27 (m, 8H), 3.97 (s, 20H), 3.91 (t, 8H), 3.20 (d, 4H,  $J = 13.31$  Hz), 1.99-1.93 (m, 8H), 1.00 (t, 12H);  $^{13}\text{C}$  NMR (100 MHz,  $\text{CDCl}_3$ ):  $\delta = 156.96, 139.21, 134.88, 132.06, 131.84, 125.77, 121.09, 117.50, 90.17, 88.61, 84.61, 69.86, 69.38, 66.69, 31.05, 23.43, 10.52$ . HRMS (ESI)  $m/z$ , calcd for  $\text{MH}^+$  ( $\text{C}_{112}\text{H}_{96}\text{Fe}_4\text{O}_4$ ): 1729.4740; found: 1729.4737.

Compound **5c**: Orange solid (170 mg, 70%)  $^1\text{H}$  NMR (400 MHz,  $\text{CDCl}_3$ ):  $\delta$  (ppm) 7.56 (s, 4H), 7.29 (d, 4H,  $J = 8.88$  Hz), 7.24 (d, 4H,  $J = 8.68$  Hz), 6.97-7.01 (m, 12H), 4.60 (m, 8H), 4.48 (d, 4H,  $J = 12.87$  Hz), 4.24 (m, 8H), 3.99 (s, 20H), 3.92 (t, 8H), 3.22 (d, 4H,  $J = 13.79$  Hz), 1.91-2.01 (m, 8H), 1.02 (t, 12H);  $^{13}\text{C}$  NMR (100 MHz,  $\text{CDCl}_3$ ):  $\delta = 156.94, 139.28, 134.77, 132.00, 129.25, 128.79, 128.21, 125.55, 123.57, 117.14, 89.65, 88.50, 84.60, 69.64, 69.01, 66.51, 30.92, 23.26, 10.36$ . HRMS (ESI)  $m/z$ , calcd for  $\text{MH}^+$  ( $\text{C}_{112}\text{H}_{96}\text{Fe}_4\text{O}_4$ ): 1729.4740; found: 1729.4737.

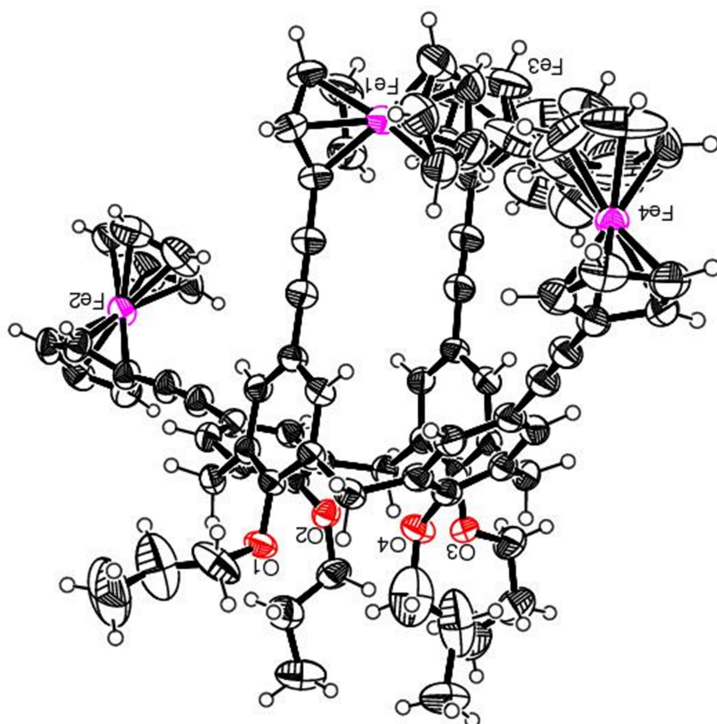

**Figure S1.** ORTEP view of **5a**. Thermal ellipsoids are plotted at the 50 % level.

### Single crystal X-ray diffraction Studies

Single crystal X-ray structural studies of **5a** were performed on a CCD Agilent Technologies (Oxford Diffraction) SUPER NOVA diffractometer. Data were collected at 293(2) K using graphite-monochromated Mo K $\alpha$  radiation ( $\lambda_a = 0.71073 \text{ \AA}$ ). The strategy for the Data collection was evaluated by using the CrysAlisPro CCD software. The data were collected by the standard 'phi-omega scan techniques, and were scaled and reduced using CrysAlisPro RED software. The structures were solved by direct methods using SHELXS-97, and refined by full matrix least-squares with SHELXL-97, refining on  $F^2$ .<sup>1</sup> The positions of all the atoms were obtained by direct methods. All non-hydrogen atoms were refined anisotropically. The remaining hydrogen

atoms were placed in geometrically constrained positions, and refined with isotropic temperature factors, generally  $1.2U_{eq}$  of their parent atoms. The crystal and refinement data are summarized in Table 2. The CCDC number [903776](#) contains the supplementary crystallographic data for **5a**. This data can be obtained free of charge via [www.ccdc.cam.ac.uk](http://www.ccdc.cam.ac.uk) (or from the Cambridge Crystallographic Data Centre, 12 union Road, Cambridge CB21 EZ, UK; Fax: (+44) 1223-336-033; or [deposit@ccdc.cam.ac.uk](mailto:deposit@ccdc.cam.ac.uk)).

**Table S1.** Crystal data and structure refinement parameter for compound **5a**.

| Compound                            | <b>5a</b>                                                                                                         |
|-------------------------------------|-------------------------------------------------------------------------------------------------------------------|
| Empirical formula                   | C <sub>88</sub> H <sub>80</sub> Fe <sub>4</sub> O <sub>4</sub>                                                    |
| Formula weight                      | 1424.92                                                                                                           |
| Temperature/K                       | 150(2) K                                                                                                          |
| Wavelength/Å                        | 0.71073                                                                                                           |
| Crystal system, space group         | Orthorhombic, <i>P cab</i>                                                                                        |
| Unit cell dimensions                | a = 15.7383(4) Å    alpha = 90 deg.<br>b = 50.6519(11) Å    beta = 90 deg.<br>c = 18.0535(4) Å    gamma = 90 deg. |
| Volume                              | 14391.8(6) Å <sup>3</sup>                                                                                         |
| Z, Calculated density               | 8, 1.315 Mg/m <sup>3</sup>                                                                                        |
| Absorption coefficient              | 0.842 mm <sup>-1</sup>                                                                                            |
| F(000)                              | 5952                                                                                                              |
| Crystal size                        | 0.34 x 0.28 x 0.22 mm                                                                                             |
| Theta range for data collection/(°) | 2.96 to 25.00                                                                                                     |
| Limiting indices                    | -18<=h<=18, -48<=k<=60, -21<=l<=21                                                                                |

---

|                                   |                                             |
|-----------------------------------|---------------------------------------------|
| Reflections collected / unique    | 111276 / 12648 [R(int) = 0.0597]            |
| Completeness to theta = 25.00     | 99.8 %                                      |
| Absorption correction             | Semi-empirical from equivalents             |
| Max. and min. transmission        | 0.8364 and 0.7627                           |
| Refinement method                 | Full-matrix least-squares on F <sup>2</sup> |
| Data / restraints / parameters    | 12648 / 0 / 869                             |
| Goodness-of-fit on F <sup>2</sup> | 1.066                                       |
| Final R indices [I > 2sigma(I)]   | R1 = 0.0672, wR2 = 0.1628                   |
| R indices (all data)              | R1 = 0.0788, wR2 = 0.1715                   |
| Largest diff. peak and hole       | 0.954 and -0.667 e.A <sup>-3</sup>          |

---

**Table S2:** Selected bond length of intermolecular interactions in the crystal structure **5a**.

---

| <b>C-H-<math>\pi</math> Interactions</b> | <b>Bond length Å</b> |
|------------------------------------------|----------------------|
| H83----C18, C13, C14, C16, C17, C15      | 2.675                |
| H56----C66, C67, C68, C65, C64           | 3.026                |
| H26----C80, C81, C82, C83, C79           | 3.19                 |
| H51----C86, C87, C88, C84, C85           | 3.597                |

---

### Electrochemical Data for 5b, 5c.

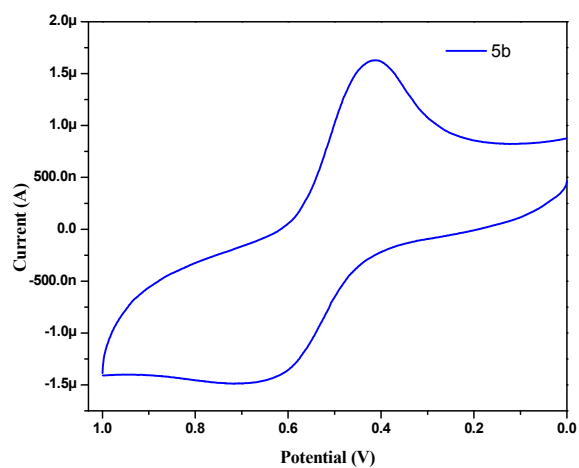

**Figure S2.** Cyclic voltammogram of calixarene **5b**.

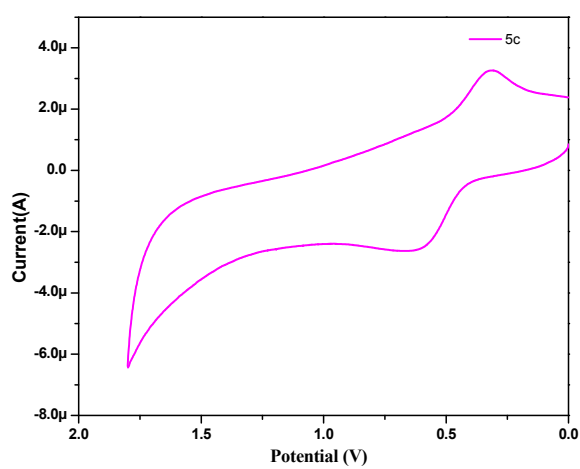

**Figure S3.** Cyclic voltammogram of calixarene **5c**.

Copies of  $^1\text{H}$  NMR,  $^{13}\text{C}$  NMR and HRMS Spectra of the Compounds 5a-5c.

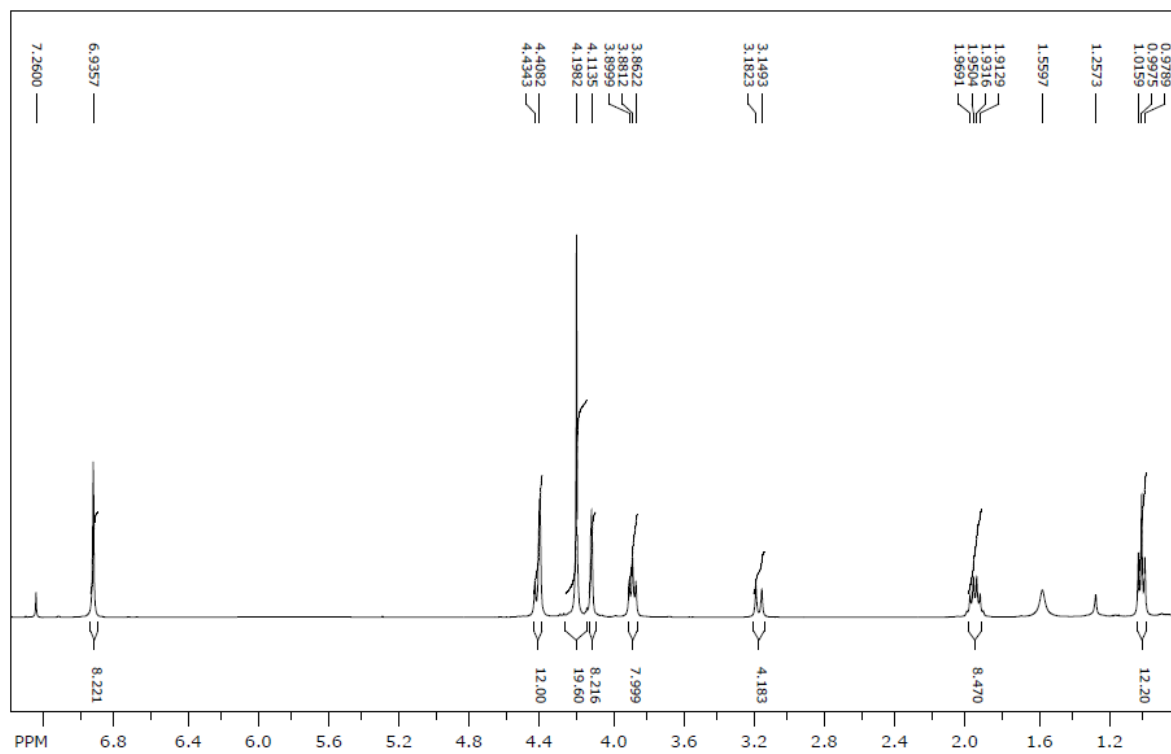

Figure S4.  $^1\text{H}$  NMR Spectra of 5a.



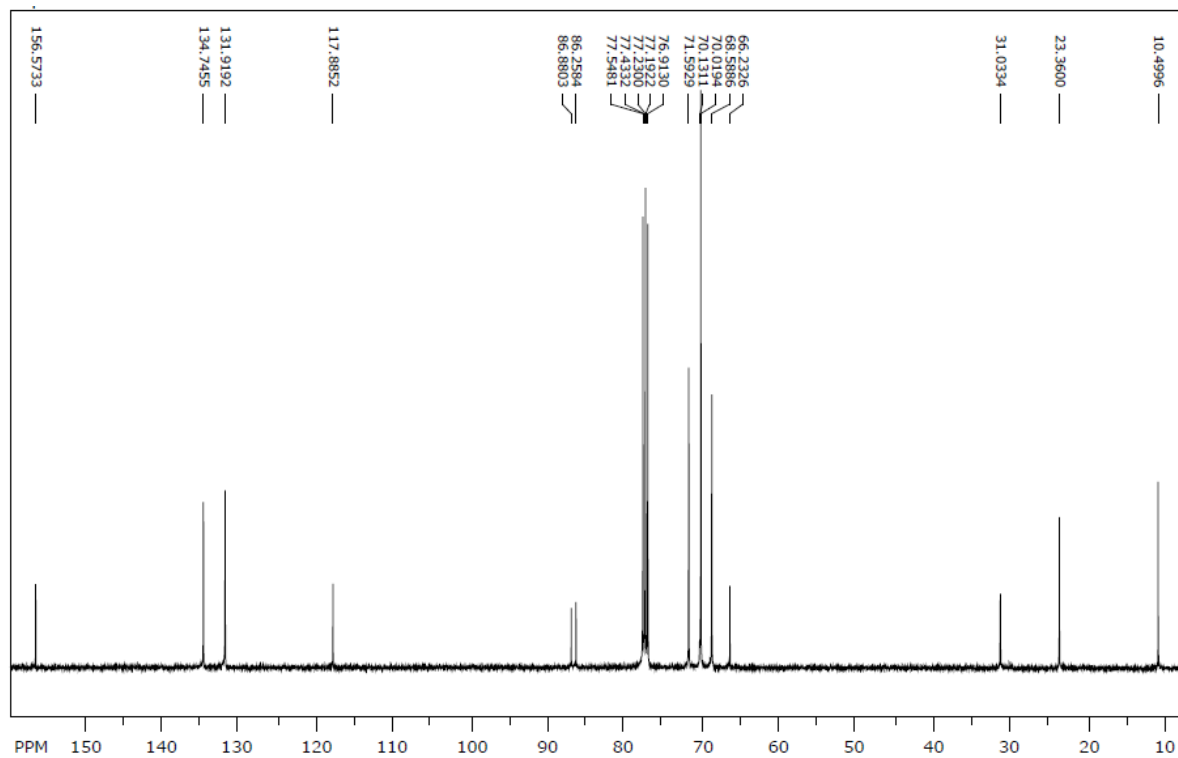

**Figure S5.**  $^{13}\text{C}$  NMR Spectra of **5a**.

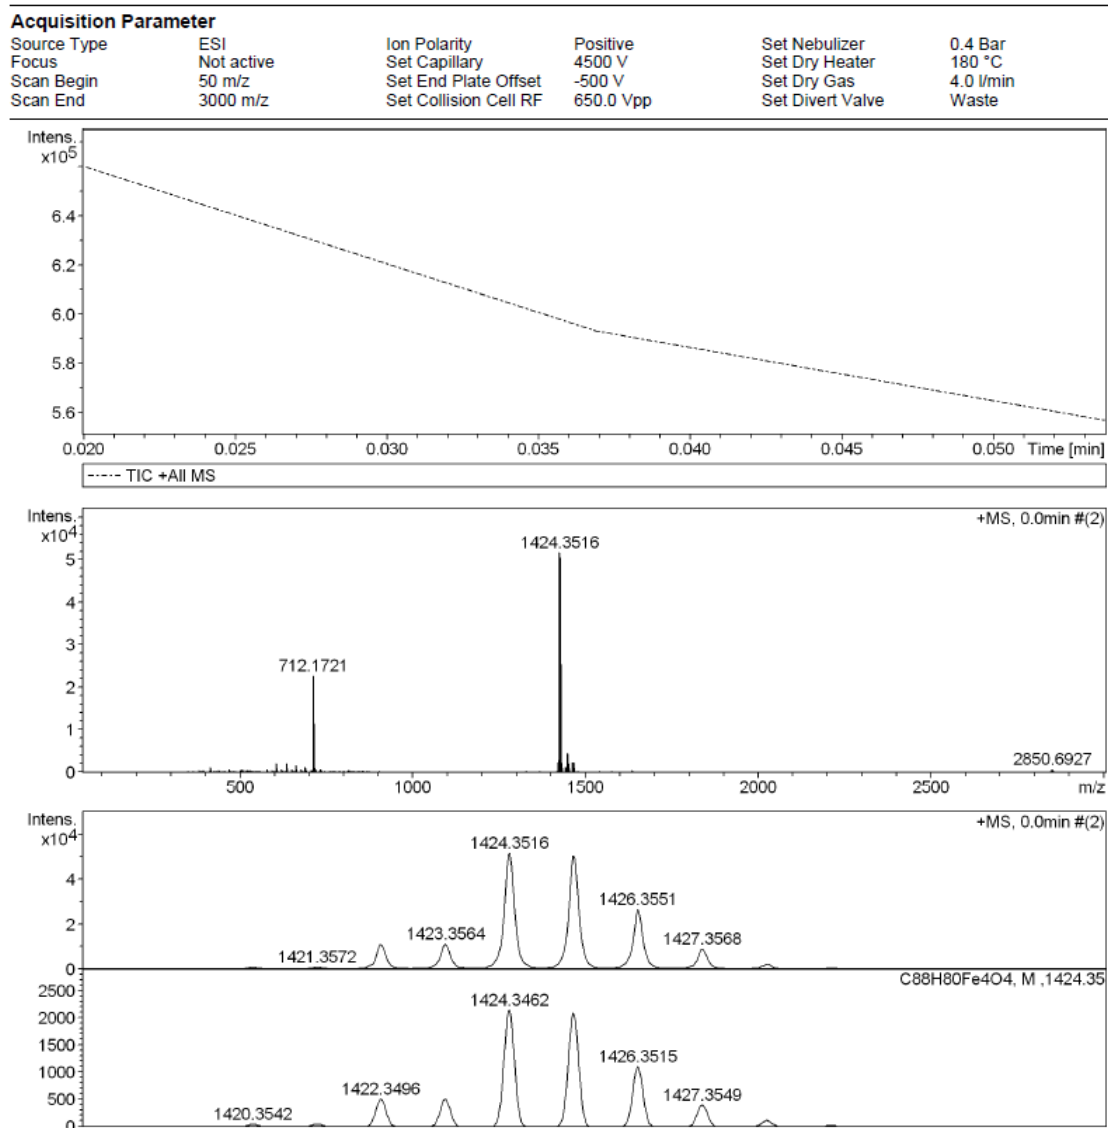

Figure S6. HRMS Spectra of 5a.

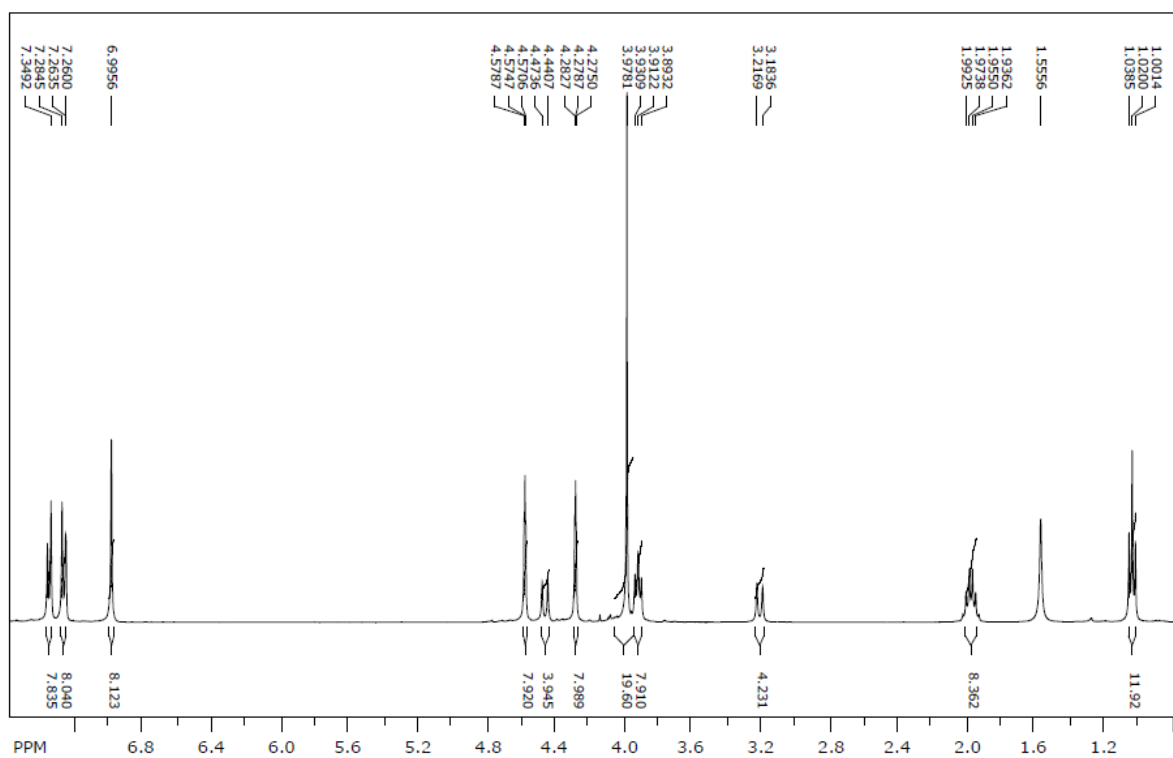

Figure S7. <sup>1</sup>H NMR Spectra of 5b.

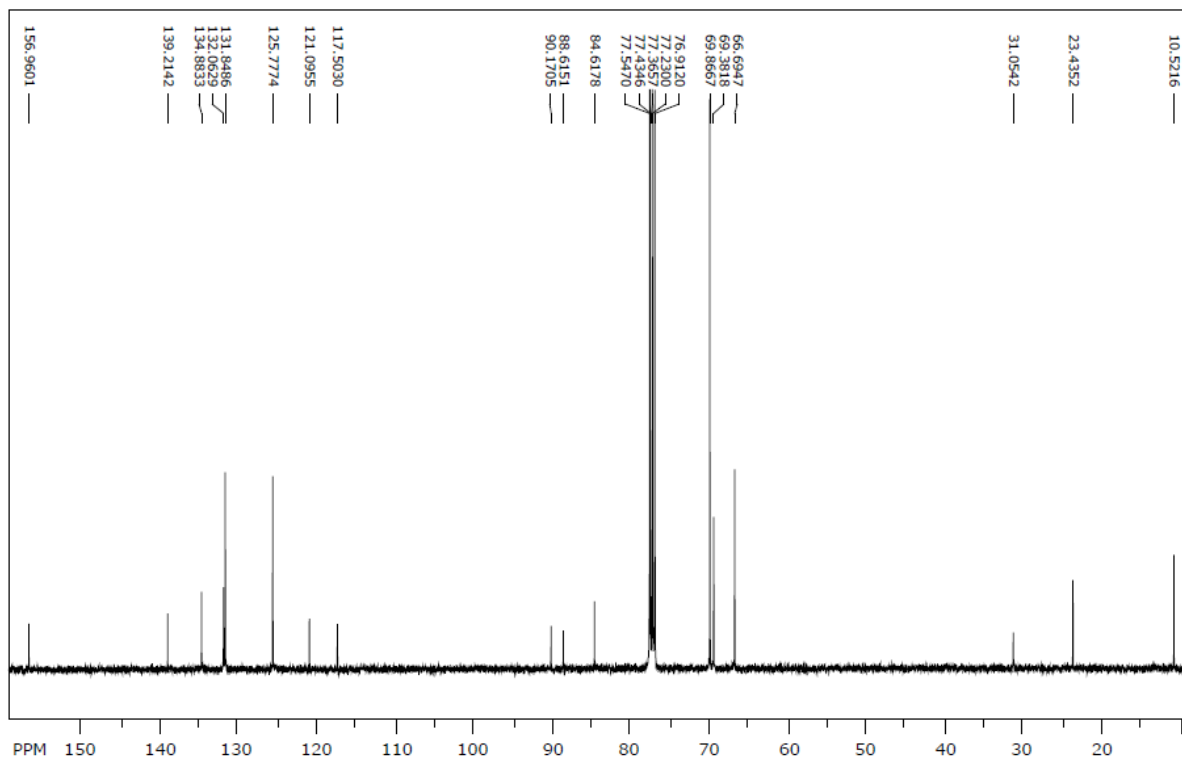

**Figure S8.**  $^{13}\text{C}$  NMR Spectra of **5b**.

**Acquisition Parameter**

|             |            |                       |           |                  |           |
|-------------|------------|-----------------------|-----------|------------------|-----------|
| Source Type | ESI        | Ion Polarity          | Positive  | Set Nebulizer    | 0.4 Bar   |
| Focus       | Not active | Set Capillary         | 4500 V    | Set Dry Heater   | 180 °C    |
| Scan Begin  | 50 m/z     | Set End Plate Offset  | -500 V    | Set Dry Gas      | 4.0 l/min |
| Scan End    | 3000 m/z   | Set Collision Cell RF | 650.0 Vpp | Set Divert Valve | Waste     |

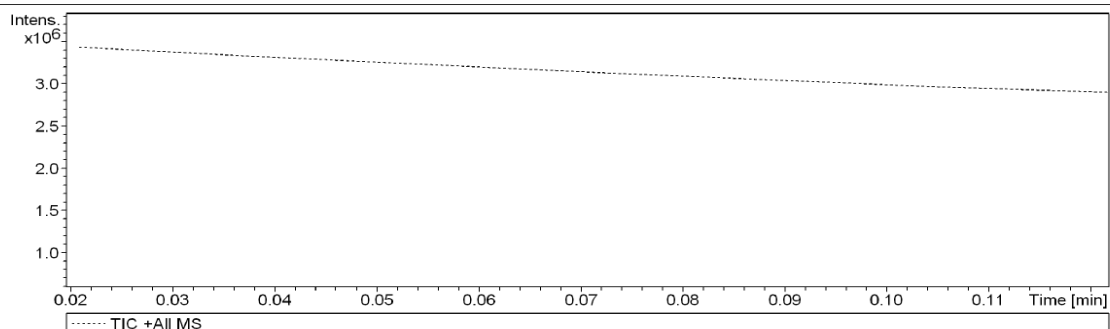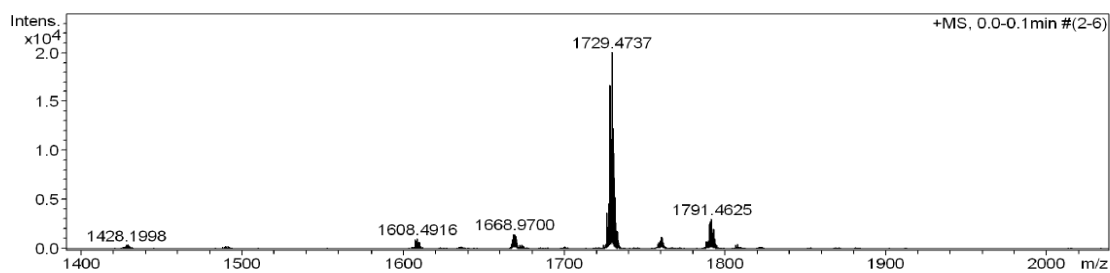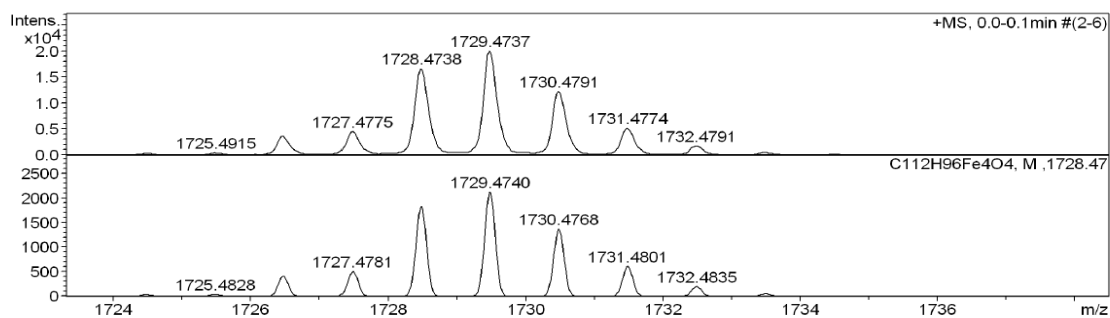

**Figure S9. HRMS Spectra of 5b.**

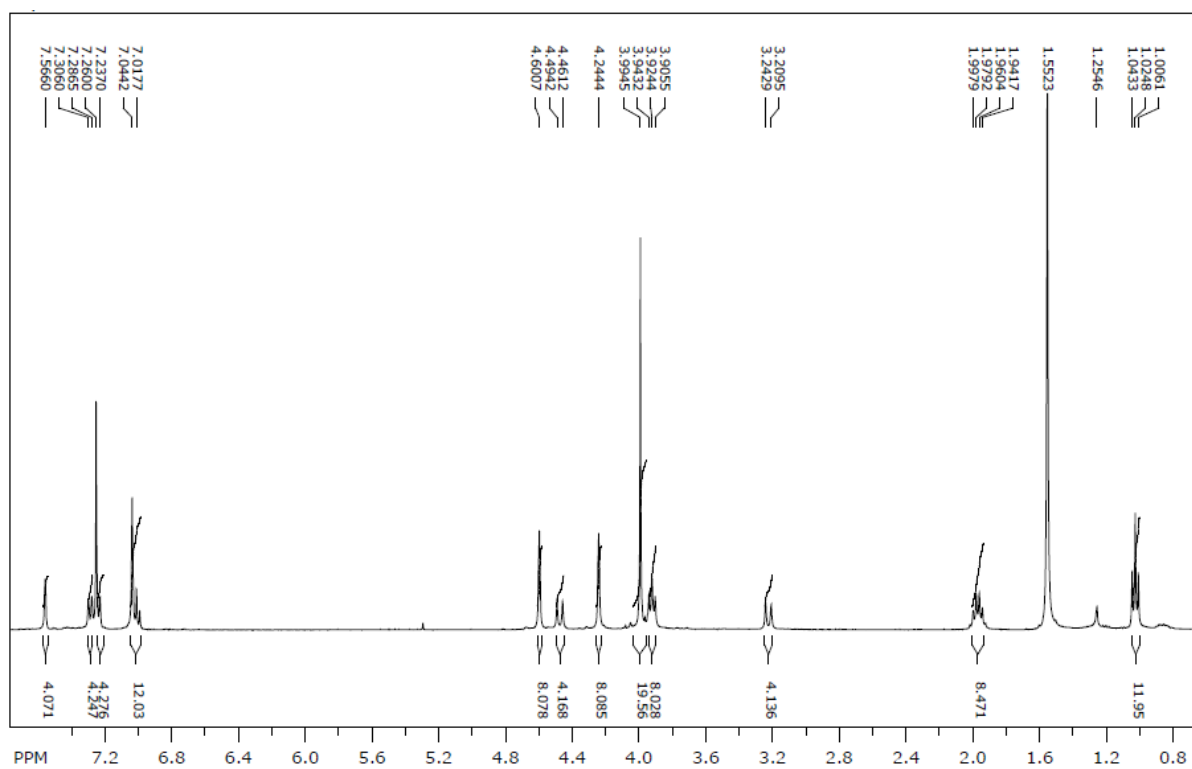

**Figure S10.** <sup>1</sup>H NMR Spectra of 5c.

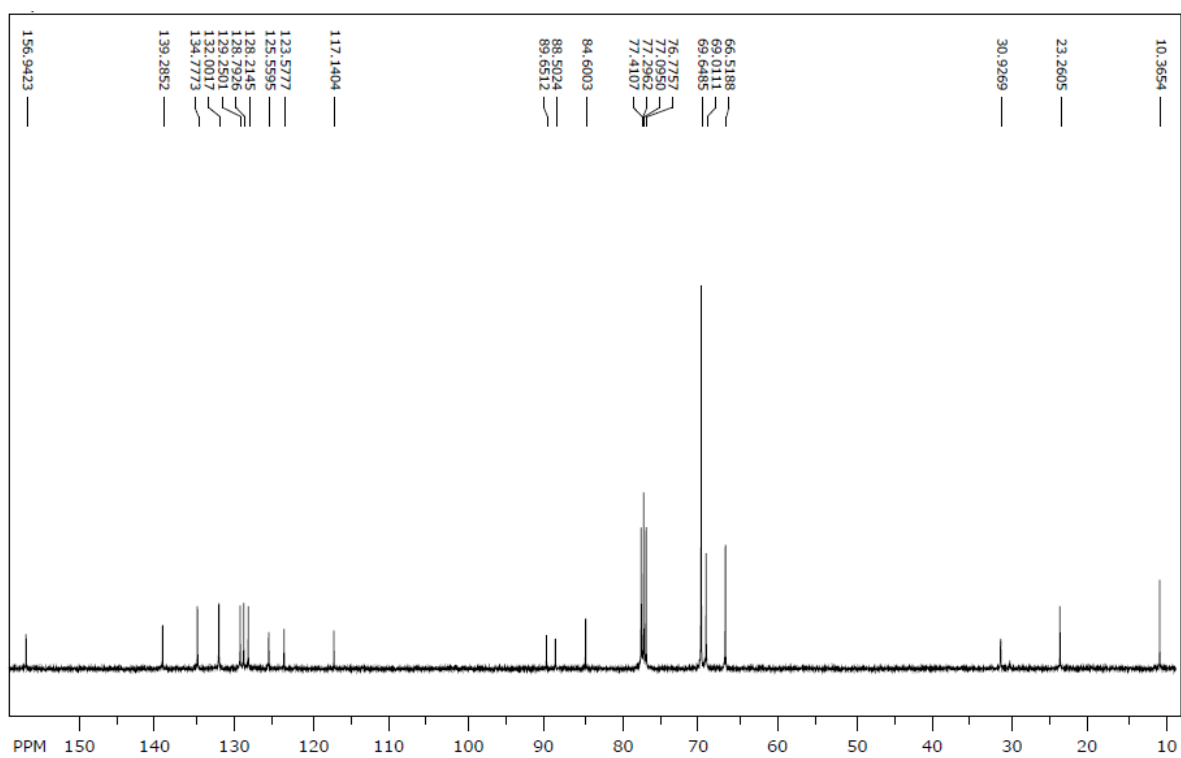

**Figure S11.**  $^{13}\text{C}$  NMR Spectra of **5c**.

**Acquisition Parameter**

|             |            |                       |           |                  |           |
|-------------|------------|-----------------------|-----------|------------------|-----------|
| Source Type | ESI        | Ion Polarity          | Positive  | Set Nebulizer    | 0.4 Bar   |
| Focus       | Not active | Set Capillary         | 4500 V    | Set Dry Heater   | 180 °C    |
| Scan Begin  | 50 m/z     | Set End Plate Offset  | -500 V    | Set Dry Gas      | 4.0 l/min |
| Scan End    | 3000 m/z   | Set Collision Cell RF | 650.0 Vpp | Set Divert Valve | Waste     |

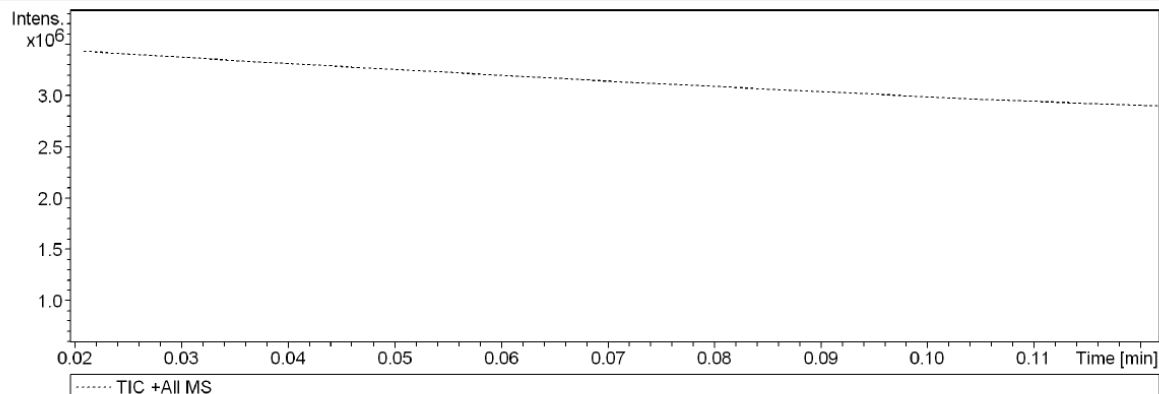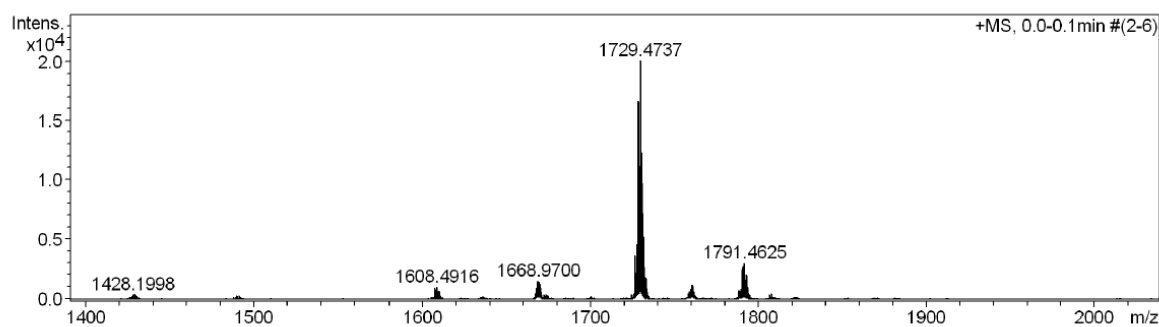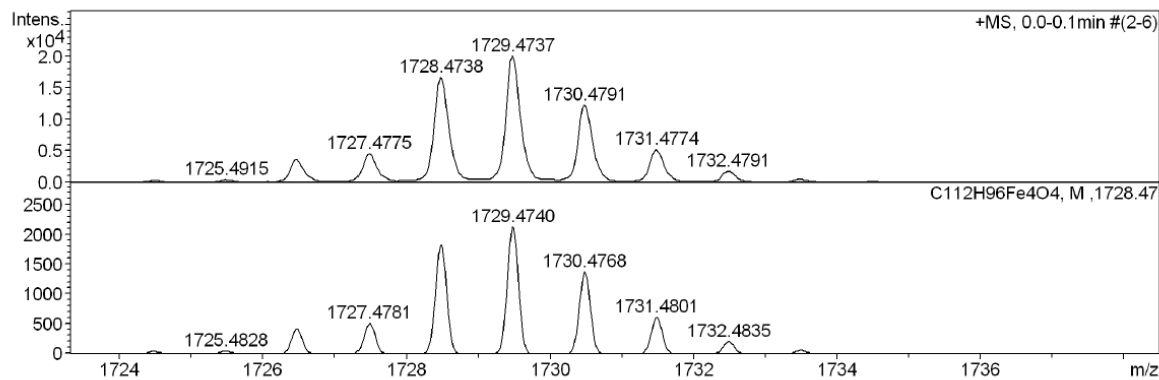

**Figure S12. HRMS Spectra of 5c.**



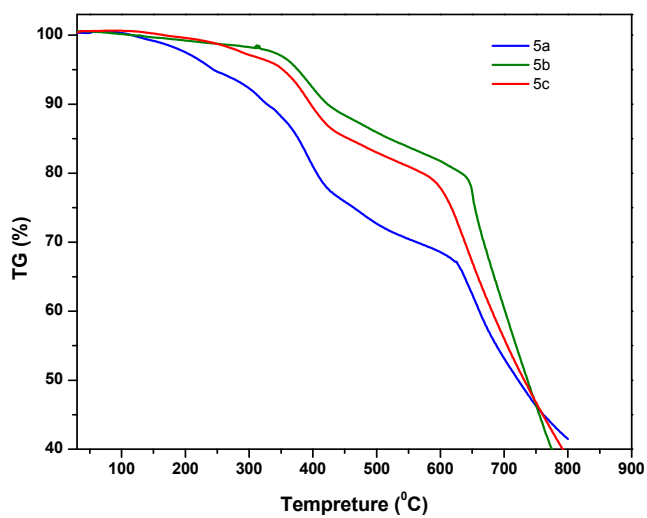

**Figure S13.** TGA plots of compounds **5a–5c**.

## References

- 1 S. Kopacka, K. Wurst, K. H. Ongania and K. Kirchner, *J. Organomet. Chem.*, 2001, 558–576.
